# Supplementary material
Source: MDPI journal article supplement (https://www.mdpi.com/2411-5134/7/4/110)
Supplement: s1 [file s1]

Archive with 1 entries (1 files):
- inventions-1996596-supplementary.pdf
